# Supplementary material for: Pyrazolylbenzyltriazoles as cyclooxygenase inhibitors: synthesis and biological evaluation as dual anti-inflammatory and antimicrobial agents
Source: Royal Society of Chemistry journal article supplement (doi:10.1039/c4nj00226a), 2014-05-22
Supplement: c4nj00226a1.pdf [file c4nj00226a1.pdf]

*Electronic Supplementary Information*

## Pyrazolylbenzyltriazoles as Cyclooxygenase Inhibitors: Synthesis and Biological Evaluation as dual Anti-inflammatory and Antimicrobial Agents

Nisha Chandna<sup>\*a</sup>, Jitander K. Kapoor<sup>\*a</sup>, Jagdeep Grover<sup>b</sup>, Khemraj Bairwa<sup>b</sup>, Varsha Goyal<sup>c</sup>, Sanjay M. Jachak<sup>b</sup>

<sup>\*a</sup>*Department of Chemistry, National Institute of Technology, Kurukshetra-136119, Haryana (India)*

<sup>b</sup>*Department of Natural Products, National Institute of Pharmaceutical Education and Research (NIPER) Sector-67, SAS Nagar, Mohali-160062, Punjab (India)*

<sup>c</sup>*Department of Microbiology, Kurukshetra University Kurukshetra-136119, Haryana (India)*

**\*Corresponding Author: Fax: +91 1744 238050, Tel.: +91 9416550164**

**E-mails: [jkkapoor11@gmail.com](mailto:jkkapoor11@gmail.com), [chandna.nisha@gmail.com](mailto:chandna.nisha@gmail.com)**

**FIGURE: 2**

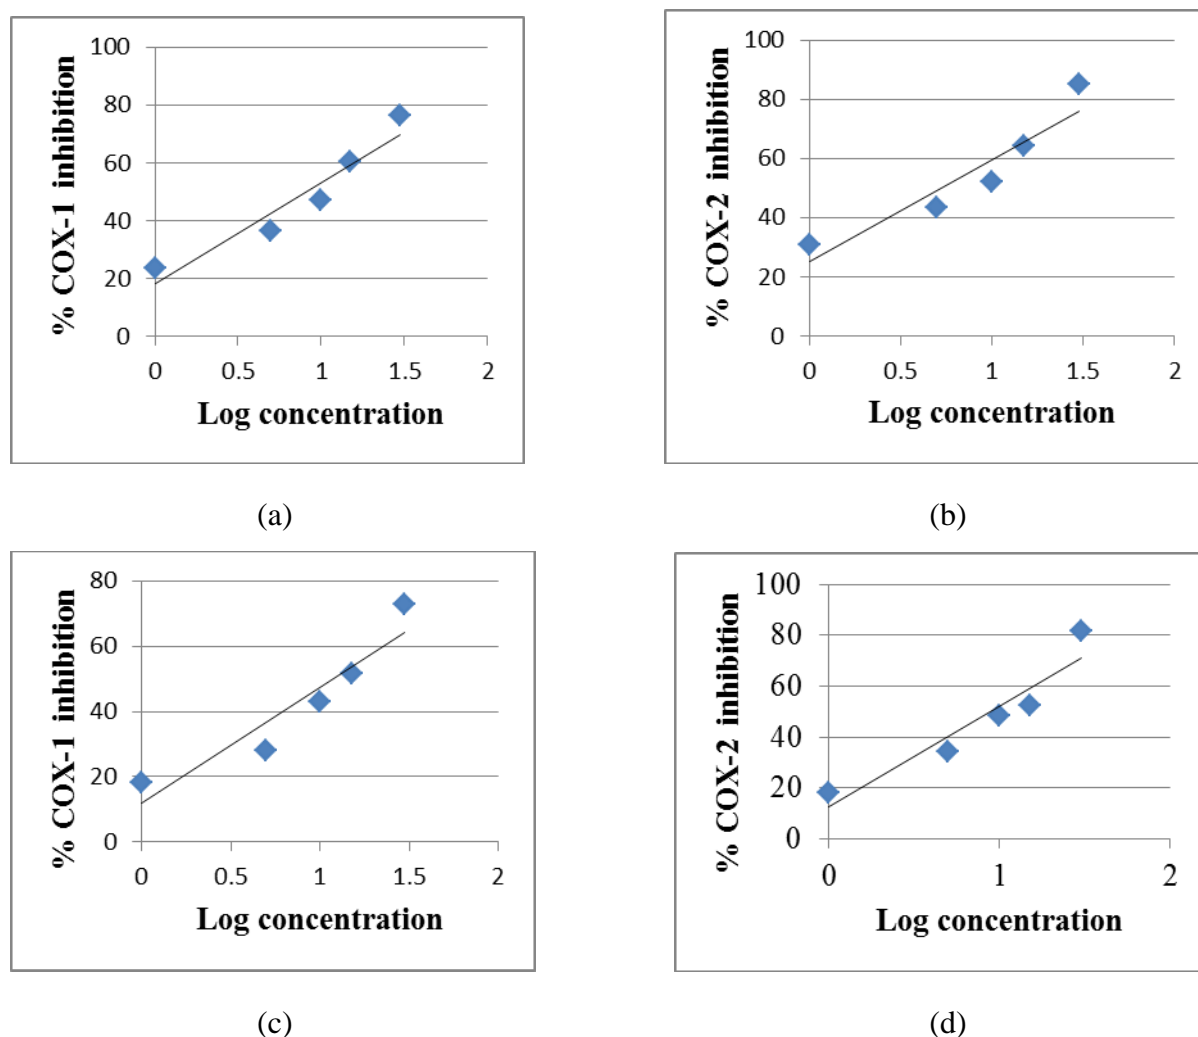

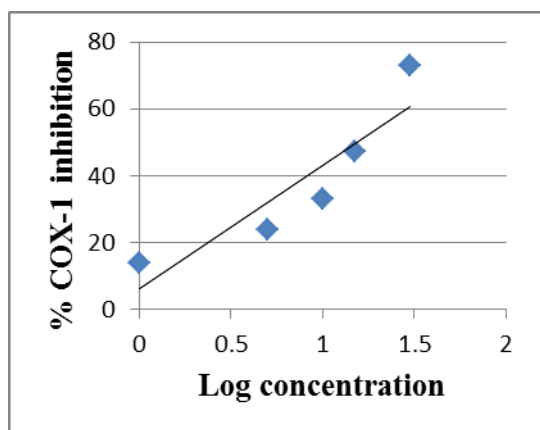

(e)

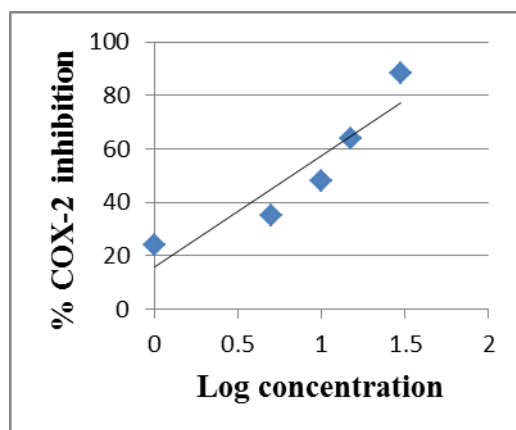

(f)

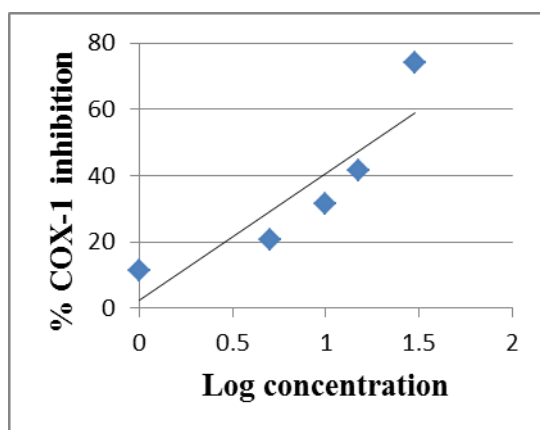

(g)

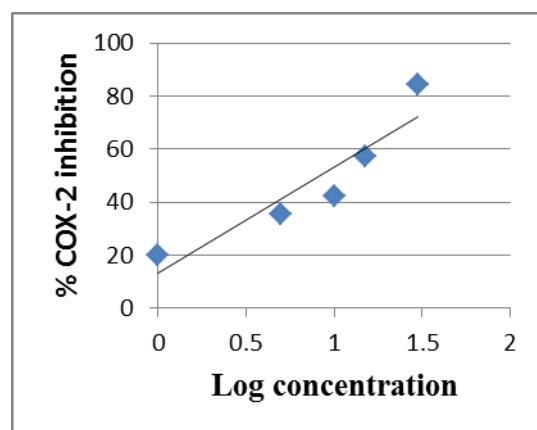

(h)

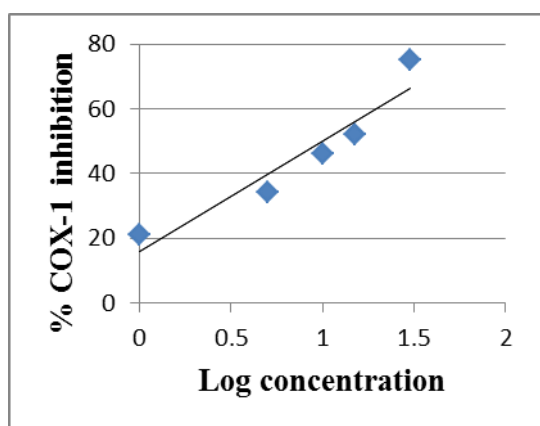

(i)

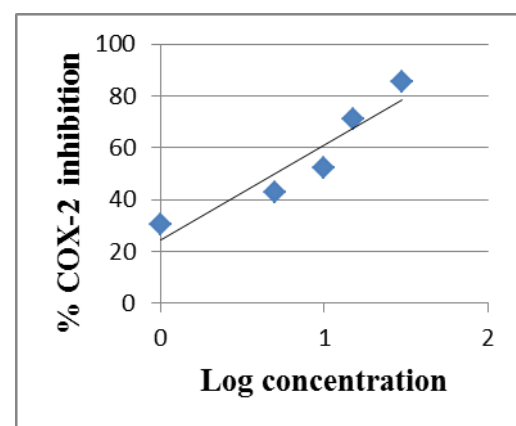

(j)

**Figure 2.** Dose-dependent inhibitory effects (a) Compound 13b on COX-1. (b) 13b on COX-2. (c) Compound 13d on COX-1. (d) 13d on COX-2. (e) Compound 13e on COX-1. (f) 13e on COX-2. (g) Compound 13g on COX-1. (h) 13g on COX-2. (i) Compound 13h on COX-1. (j) 13h on COX-2.
